# Supplementary material for: Randomized Questionnaire Based Case–Control Research Study on Evaluation of Sexual Function in Indian Patients Taking Oral Finasteride for Androgenetic Alopecia
Source: PubMed Central journal article supplement — Dermatol Ther (Heidelb). 2015 Oct 5;5(4):231–4. doi: 10.1007/s13555-015-0084-3 (PMC4674453; doi:10.1007/s13555-015-0084-3), 2015-10-05
Supplement: 13555_2015_84_MOESM1_ESM.pdf [file 13555_2015_84_MOESM1_ESM.pdf]

## *Why carry out this study?*

- Finasteride is one of the most common drugs used in androgenetic alopecia.
- The literature discusses the sexual side effects, however in practice we don't see much.
- The aim of the present study was to investigate the sexual dysfunction in patients taking finasteride 1mg for androgenetic alopecia using a questionnaire given to approximately 586 male Indian patients.

## *What was learned from the study?*

- Analysis showed no significant difference in sex related problems with that of patients taking finasteride and age matched controls, suggesting that sex related issues are not a side effect of finasteride.

This summary slide represents the opinions of the authors. For a full list of acknowledgments and disclosures for all authors of this article, please see the full text online. © The Author(s) 2015. Creative Commons Attribution Noncommercial License (CC BY-NC).
